# Supplementary material for: Revisiting the Total Contact Cast
Source: Oxford University Press journal article supplement (doi:10.2337/diacare.28.4.929), 2005-04-01
Supplement: pg929appendix.doc [file pg929appendix.doc]

#### APPENDIX: Casting Methods

#### The procedure for method B, the wound-isolation TCC, is described below and illustrated in Figure 2. Method A, the traditional TCC, would omit the wound foam step (step 7) shown in Figure 2f. Placement of the Pliance® sensor used in this investigation is also shown although it would not be included clinically.

**Method B: Application of the wound-isolation TCC used in this study:**

1) Place lamb’s wool between the subject’s toes to prevent maceration of web spaces (Fig. 2b).

2) Apply tube gauze (stockinette) over the foot and sensor and proximally to the mid-patellar level. Cut the stockinette from malleolus to malleolus to avoid bunching on the dorsum of the ankle. Fold and tape any extra stockinette over the dorsum of the toes (Fig. 2c-d).

3) Protect sensor leads with a tough rubber sheath. Cut an exit at the base of the stockinette heel for the sensor leads.

4) Fold 0.95 cm (0.375 “) thick Sifoam® (AliMed, Dedham, MA) over the toes to allow mobility and to protect the toes. Foam should begin in the plantar sulcus and end on the dorsal surface web space. Skive (taper) the edges of the foam to provide a smooth transition between padded and non-padded regions (Fig. 2e).

5) Apply 0.635 cm (0.25”) thick felt padding strips to the anterior tibial border from two fingers below the tibial tubercle to the crease of the ankle (Fig. 2f).

6) Apply 7.6 cm (3”) diameter circles of 0.635 cm (0.25”) thick felt padding to the medial and lateral malleoli (Fig. 2f).

7) Center a 7.62 cm (3”) diameter circle of Sifoam® over the wound. If necessary, remove toe foam to accommodate the circle. Skive the edges to provide a smooth transition (Fig. 2f).

8) Apply a single layer of cast padding starting at the proximal end of the tibial padding and ending with 3 cm overlapping the toe Sifoam® (Fig. 2g). Wrap the proximal end with cast padding two more times to create a cuff.

9) Begin wrapping proximally with a 10.2 cm (4”) fiberglass roll. Wrap twice around the top of the felt padding and proceed down the leg in a helical fashion until just proximal to the malleoli. Finish the roll by passing back up the leg towards the knee. Care should be taken to remove bubbles or folds and keep the cast in complete contact with the leg.

10) Fold the protruding end of the stockinette over the first layer of fiberglass and begin wrapping with a second 10.2 cm (4”) roll just below the top of the cast. Follow the same course up to the ankle and back down the leg. Aim for at least three layers of fiberglass everywhere. Make sure the foot and ankle are in proper position before proceeding (amount of ankle dorsiflexion desired may change with ulcer location (18); the foot should be in a neutral position as far as supination/pronation is concerned).

11) Begin a 7.6 cm (3”) roll at the ankle. Wrap in a figure-eight manner around the ankle, over the first 3 cm of the Sifoam®, and back over the ankle.

12) Start a second 7.6 cm (3”) roll at the ankle and continue up over the toe Sifoam®. Loop the fiberglass 3 times back and forth to create a cover for the front of the toes. Use the remaining fiberglass to hold the toe cover and further reinforce the foot and ankle (Fig. 2h).

13) If necessary, use a third 7.6 cm (3”) roll to reinforce the foot and ankle. Rub the plantar surface of the cast to insure intimate contact with the foot.

14) Allow the cast to set in a non-weight bearing position for 20 minutes and then apply a low-profile Velcro cast boot (Fig. 2i).
