# Supplementary material for: Revisiting the Total Contact Cast
Source: Oxford University Press journal article supplement (doi:10.2337/diacare.28.4.929), 2005-04-01
Supplement: pg929onlineappendixfig_2.doc [file pg929onlineappendixfig_2.doc]

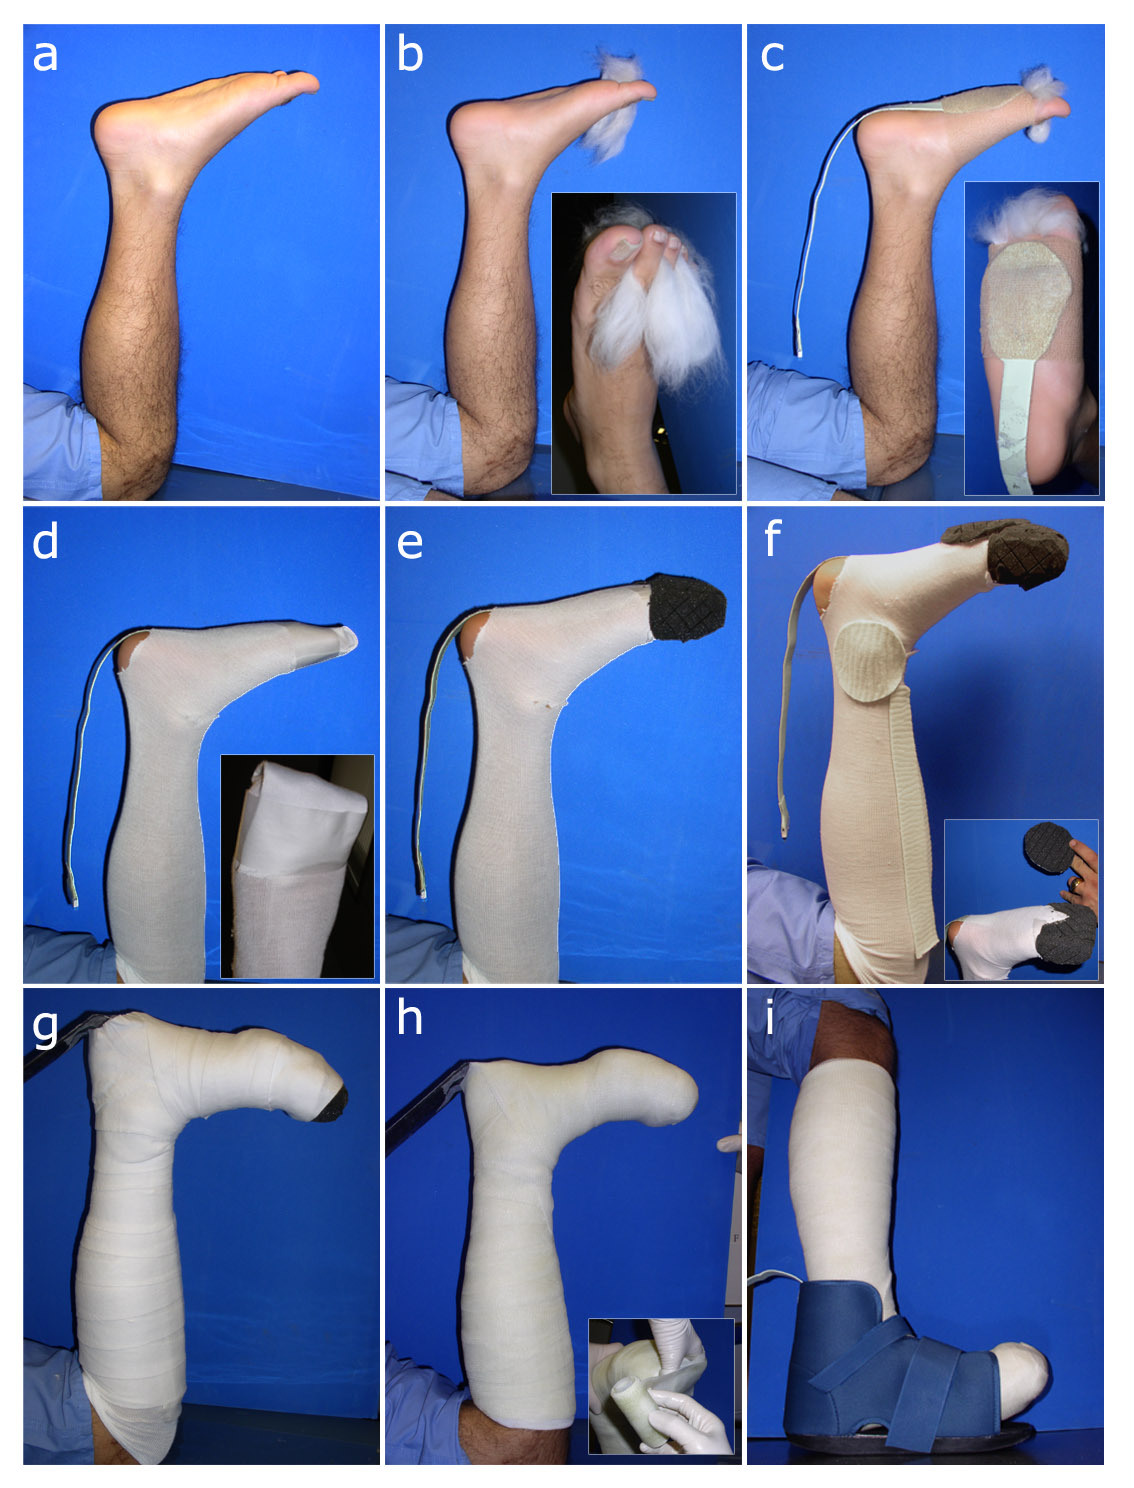


Fig. 2— Total contact casting technique as described in the online appendix. The foam added to provide wound isolation is shown in panel *f*.
